# Supplementary material for: Cross talk between miR-214 and PTEN attenuates glomerular hypertrophy under diabetic conditions
Source: PubMed Central journal article supplement (PMC4994004; doi:10.1038/srep31506), 2016-08-23
Supplement: srep31506-s1.pdf [file srep31506-s1.pdf]

# **Cross talk between miR-214 and PTEN attenuates glomerular hypertrophy under diabetic conditions**

Xiaoxia Wang<sup>1,2</sup>, E Shen<sup>3</sup>, Yanzhe Wang<sup>1</sup>, Junhui Li<sup>2</sup>, Dongsheng Cheng<sup>2</sup>, Yuqiang Chen<sup>2</sup>, Dingkun Gui<sup>2</sup> & Niansong Wang<sup>2</sup>

<sup>1</sup>Department of Nephrology, Shanghai Tong Ren Hospital, Shanghai Jiao Tong University School of Medicine, Shanghai 200336, China. <sup>2</sup>Department of Nephrology and Rheumatology, Shanghai Jiao Tong University Affiliated Sixth People's Hospital, Shanghai 200233, P. R. China. <sup>3</sup>Department of Ultrasound in Medicine, Shanghai Tong Ren Hospital, Shanghai 200336, P. R. China

Correspondence and requests for materials should be addressed to D.G. (email: dingkungui@alu.fudan.edu.cn) or N.W (email: wangniansong2012@163.com)

## Supplementary information

We listed candidate microRNA genes and target genes on degree level in table form S1 and S2.

**Table S1. The degree of miRNAs**

| microRNAs      | degree |
|----------------|--------|
| mmu-miR-214    | 8      |
| mmu-miR-155    | 6      |
| mmu-miR-130b   | 6      |
| mmu-miR-22     | 4      |
| mmu-miR-139-5p | 4      |
| mmu-miR-132    | 4      |
| mmu-miR-150    | 3      |
| mmu-miR-713    | 3      |
| mmu-miR-195    | 2      |
| mmu-miR-193b   | 2      |

We used the degree to take miR-214 as the strongest candidate gene

**Table S2. The degree of target genes**

| target genes | degree |
|--------------|--------|
| PTEN         | 4      |
| Itch         | 2      |
| Glyctk       | 2      |
| Csf1         | 2      |
| Caprin1      | 2      |
| Rfx7         | 2      |
| Dll1         | 2      |
| Naa50        | 2      |
| Csf1r        | 2      |
| Rgp1         | 2      |
| QK           | 2      |
| Gpm6b        | 2      |
| Sox1         | 1      |
| Mbtd1        | 2      |
| Cfl2         | 2      |
| Meis2        | 2      |
| Myst3        | 2      |
| Eif4b        | 2      |
| Zbtb34       | 3      |
| Chd2         | 2      |

We used the degree to take PTEN as the strongest target gene
